# Supplementary material for: Evaluation of FDG-PET/CT Use in Children with Suspected Infection or Inflammation
Source: Diagnostics (Basel). 2020 Sep 18;10(9):715. doi: 10.3390/diagnostics10090715 (PMC7554864; doi:10.3390/diagnostics10090715)
Supplement: Supplementary file 1 [file diagnostics-10-00715-s001.xlsx]

## Sheet: Sheet1
Accuracy diagnostic scans
	Ziek	Niet ziek
pos test	26	2		0.928571		echter ook een patient met intestinal uptake geinterpreteerd als IBD maar was fysiologisch
neg test	1	20		0.952381
Accuracy follow-up scans
	Ziek	Niet ziek
pos test	8	1		0.888889
neg test	0	8		1
Accuracy all scans (n=66, inconclusive scan excluded)
	Ziek	Niet ziek
pos test	34	3		0.918919
neg test	1	28		0.965517
1 inconclusive scan excluded, because antibiotic treatment was initiated following the scan and its uncertain what the natural course would have been
1 TP was misinterpreted, but this cannot be attributed to PET-CT properties

## Sheet: Supplement 1 
Diagnostic question, diagnostic information and consequence of FDG- PET/CT performed for primary diagnosis (diagnostic scans)
Diagnostic scans	Count	48 patients with 48 disease episodes	Diagnostic question before PET/CT	underlying disease	Scan findings				Diagnostic question answered	Contributed to diagnosis			Final diagnosis(n= 34)	Provisional diagnosis n=4)	New diagnosis due to PET/CT (n=4)	New diagnosis not due to PET/CT(n=2)	infectious, inflammatory, oncologic, miscellaneous)	Impact on management in negative scans
	50 scans				positive	Negative	Nonspecific											Positive impact	Negative impact
							Interpreted as positive	Interpreted as nonspecific		Excluding further diagnostics or together with other diagnostic clues	Through targeted evaluation	Evaluation following PET/CT results							Misinterpretation of uptake	Additional test
True positives (26)
	1	1	CRMO, metabolic condition, JIA, sickle cell crisis, vasculitis		yes				yes		yes	X knee, and biopsy	CRMO				inflam
	2	2	GvHD, infection, lymphoma	Bone marrow transplantation	yes				yes		yes	BAL	Pulmonary aspergillosis				infect
	3	3	Pathological uptake, vasculitis, lymphoma		yes				yes		yes	Consultation rheumatologist	Undifferentiated connective tissue disease				inflam
	4	4	Infectious or inflammatory focus		yes				yes		yes	MR angiography	Takayasu				inflam
	5	5	Disseminated inflammation or oncologic disease	Nephrotic syndrome and pancreatitis	yes				yes		yes	Drainage	Infected pancreatic pseudocyst		yes		infect
	6	6	Infection, vasculitis, paraneoplastic, malignancy?		yes				yes		yes	Ultrasound	Lemierre		yes		infect
	7	7	Infection, inflammation, recurrence of leukemia	Acute lymphatic leukemia, treatment completed 2 years ago.	yes				yes		yes	Biopsy	Bartonella		yes		infect
	8	8	Infection? Unkown focus of fever?		yes				yes	yes			systemic JIA				inflam
	9	9	Infectious focus?		yes				yes		no	Biopsy	x	reactive tissue and steroid treatment*
	10	2nd scan	FDG uptake compared to previous scan?		yes				yes		yes	Excision Biopsy	Hodgkin				oncol
	11	10	Infection, malignancy, sarcoidosis		yes				yes	yes			Sarcoidosis				inflam
	12	11	Origin of fever?	hypertrophic cardiomyopathy and atrioventricular block, ICD implanted 2 yrs ago.	yes		yes		yes		yes, but contradicted PET/CT	Transesophageal ultrasound		ICD lead associated infection			infect
	13	12	Unexplained inflammatory process? Localisation and distribution of uptake?		yes				yes		yes	Revision of histologic finding	Anaplastic large cell lymphoma				oncol
	14	13	Explanation for FUO. Infection?	Acute lymphatic leukemia, receiving maintenance treatment	yes				yes		yes, but contradicted PET/CT	Ultrasound		Cholecystitis			infect
	15	14	Osteomyelitis, bone necrosis, primary malignancy or metastasis		yes				yes		yes	Biopsy	Osteomyelitis				infect
	16	15	Osteomyelitis, CRMO, malignancy		yes				yes	yes			CRMO				inflam
	17	16	Hematological malignancy, liver process or abscess elswhere?		yes		no		yes		yes	Biopsy	CRMO				inflam
													n=14
	18	17	Extent of suspected mycobacterial infection,biopsy location?	Immune deficiency (IFN gamma deficiency)	yes				yes		yes	bone marrow punction, bone biopsy, lymph node excision	Disseminated mycobacterial infection				infect
	19	18	Large vessel vasculitis		yes	no signs of large vessel vasculitis	yes, intestinal uptake		yes, but misinterpretation result				polyarteritis nodosa			Yes	inflam		Yes	abdominal MRI, serology, fecal calprotectin, colonoscopy
	20	19	Suspected Churge-Strauss disease, hematological malignancy		yes					yes			Churge-Strauss vasculitis				inflam
	21	20	Local infection at surgical site?	Recent bone surgery using osteosynthesis material	yes				yes		yes	Drainage and culture	Local infection				infect
	22	21	Endocarditis	congenital heart defect. Last cardiac surgery 2 years ago	yes				yes	yes			Endocarditis				infect
	23	22	Endocarditis	Trisomy 21, Atrioventricular septal defect. Recent valve replacement surgery and pacemaker implant	yes				yes	yes			Endocarditis				infect
	24	23	Dissemination of suspected TB		yes				yes	yes		Ultrasound kidneys	Tuberculous meningitis				infect
	25	24	Extent of LNN or sarcoidosis		yes				yes	yes			hypereosinophilic syndrome				inflam
	26	25	Systemic juvenile idiopathic arthritis, Hodgkin lymphoma		yes				yes		yes	bone marrow biopsy	sJIA				inflam
	27	26	Endocarditis	Cardiomyopathy with placement of mitral valve ring	yes				yes					infectious pericarditis*
	28	2nd scan	Local endocardial infection, pericardial infection, other source?	Congenital heart disease, last cardiac surgery 3 weeks ago	yes				yes	yes			Inflammatory pericarditis (same disease episode)		yes		inflam
													n=10
False positives (1)
	29	27	Chronic infection or inflammation like IBD? pathological lymph nodes?		yes		yes		no		no	Colonoscopy	Unknown						Yes	Yes, colonoscopy
True negatives (20)
	30	28	Chronic process behind unexplained weight loss?			yes			yes	yes			Anorexia nervosa				misc
	31	29	Infectious process or malignancy?			yes		yes	yes	unknown			Unknown					Yes, reassurance parents	yes	Yes, abdominal ultrasound
	32	30	Infectious origin of fever?	Congenital heart disease, last surgery 4 months ago		yes			no	unknown			Unknown					Yes, excluding contraindication cardiac surgery
	33	31	Infection or recurrent leukemia	Bone marrow transplantation (AML)		yes			no	unknown			Unknown, patient died 2 weeks later
	34	32	Origin of fever? Osteomyelitis, pulmonary infection, other abnormalities?	22q11 microdeletion syndrome with congenital cardiac defect		yes		yes	no	unknown			Unknown					Possibly , in ruling out osteomyelitis
	35	33	Origin of fever?			yes			no				PFAPA				inflam
	36	34	Central vasculitis, septic emboli. Increased uptake elsewhere?			yes			yes		yes	Biopsy	PACNS				inflam
	37	35	Sarcoidosis, vasculitis, multiple sclerosis, infectious disease?	Uveitis and white matter lesions on MRI		yes			no	unknown			Unknown
	38	36	Infectious, auto-immune, Hodgkin lymphoma			yes			yes	unknown			Unknown, possibly adequately treated bacterial or viral infection.					Yes, in ruling out malignancy, active infection or inflammation
													n=3
	39	37	mediastinitis or infection of prosthetic material	Marfan syndrome and cardiac surgery (valve saving aorta replacement)		yes			yes	unknown (fever disappeared day before scan)				Possibly viral infection
	40	38	arthritis or coalition			yes		yes	yes	yes				Possibly resolved arthritis
	41	39	pulmonary inflammatory activity	pulmonary hypertension		yes		yes	yes	yes			fibrotic lung disease				misc
	42	40	Endocarditis	VSD		yes			yes	yes			Bacteriemia without metastatic disease				infec
	43	41	Endocarditis	systemic JIA and recent ASD closure with Amplatzer device		yes	yes, by nuclear medicine specialist		yes	yes			relapse of systemic JIA				inflam		yes	abdominal ultrasound and fecal calprotectin
	44	42	Cholangitis	Biliary atresia and Kasai procedure with recurrent cholangitis		yes			yes	unknown			unknown
	45	43	Other foci outside the central nervous system of suspected autoimmune disease	meningoencephalitis		yes			yes	yes			(acute demyelinating encephalomyelitis)ADEM				inflam
	46	44	sarcoidosis	interstitial lung disease		yes			yes	unknown			unknown
	47	45	Suspected central catheter infection, focal infection	Intestinal failure, failure to thrive and total parenteral nutrition		yes			yes	yes			Bacteremia without metastatic disease				infect
	48	46	Local infection in the neck?	desmoid tumor and fistula of the neck		yes			yes	yes				data missing> 3 months after scan, referral to university hospital for suspected autoinflammatory syndrome
	49	47	infection of the native kidneys	Prune belly syndrome and kidney transplant		yes			yes	yes			Urinary tract infection, no infection of native kidney				infect
													n=6
False negative (1)
	50	48	CRMO, inflammatory activity in organs?			yes			partially, but failed to detect IBD				IBD			yes	inflam			yes (FN)
													n=1
														* these provisional diagnoses proved wrong. The final diagnosis was found after the second PET/CT that showed largely unchanged uptake.

## Sheet: Supplement 2
Clinical situation, findings and consequence of FDG-PET/CT performed to monitor disease activity (follow-up scans)
Follow- up scans		inflammatory of infectious episode	Underlying disease	Scan findings				Consequence Tx	Consequence Dx	No contribution or negative impact
				positive	Negative	Nonspecific				Due to Indication or timing	Due to PETCT characteristic	Additional test
						Interpreted as positive	Interpreted as non specific
Follow up scan
Stable or improving clinical symptoms
infectious disease	1	Mediastinitis after 1 year of antibiotic treatment	Congenital heart defect requiring surgery (Ross)		yes			Continue antibiotic treatment
	2(a	Endocarditis, 5 days after cessation of antibiotic treatment	congenital heart defect requiring multiple surgeries		yes		yes		repeat PETCT	PET/CT performed too soon after cessation of abx, repeated 2 weeks later		PETCT
	3	Systemic candida infection, treatment effect	Acute lymphoblastic leukemie		yes			Finish course of antifungal therapy
	4	Lung lesions, either infectious or oncologic. Effect of antibiotic treatment on FDG uptake lung	Hodgkin	yes					Bronchoalveolar lavage
autoimmune disease	5	Pachymeningitis, follow up after weaning of steroids		yes, stable				Intensify treatment: start rituximab 3 months later
	6	Activity of Takayasu vasculitis without treatment, before performing necessary cardiac surgery	congenital heart defect requiring surgery		yes			Plan cardiac surgery
Deteriorating clinical symptoms, fever or elevated inflammatory markers
infectious disease
	7(b	PVL producing staphylococcal generalized infection. Uncontrolled fever under antibiotic treatment		yes, deteriorated				Change of antibiotic therapy
	8(b	PVL producing staphylococcal generalized infection. Improved clinical condition, persisting fever		yes, improved				Change from intravenous to oral therapy
	9(a	Endocarditis, 18 days after cessation of antibiotic treatment	congenital heart defect requiring multiple surgeries		yes		yes	start oral antibiotic treatment and discharge
	10	Generalized infection with aspergillus. Under treatment rise in galactomanan levels	acute lymphatic leukemia	yes, improved				Continuation of treatment
	11	Central venous catheter infection with candida and klebsiella. Under treatment clinical deterioration	short bowel syndrome and total parental nutrition	yes, deteriorated				Change of antibiotic therapy
	12	Bacteremia with Staphylococcus Aureus. Fever under treatment			yes			Continuation of treatment
	13	Coxarthritis. Under treatment increasing CRP		Yes, only localized				Continuation of treatment
autoimmune disease	14	Granulomatosis with polyangiitis, increasing dyspnea under treatment			yes			Continuation of treatment
(a and (b: indicates that scans were performed in same patients (a, b)
Tx: therapy
Dx: diagnostic tests
